# Supplementary material for: EULAR recommendations for intra-articular therapies
Source: HighWire-hosted journal article supplement (doi:10.1136/annrheumdis-2021-220266), 2021-05-25
Supplement: annrheumdis-2021-220266supp001_data_supplement.pdf [file annrheumdis-2021-220266supp001_data_supplement.pdf]

| Research question                                                                                                                                            | P (population)                | I (intervention or factor)                   | C (comparator)                  | O (outcome)                                                         | T (trials)                                                  | order | TOPIC                |
|--------------------------------------------------------------------------------------------------------------------------------------------------------------|-------------------------------|----------------------------------------------|---------------------------------|---------------------------------------------------------------------|-------------------------------------------------------------|-------|----------------------|
| Is it safe to inject glucocorticoid (GC), hyaluronic acid (HA), saline, or others before a total joint replacement (TJR)?                                    | TJR indications*              | IAT**                                        | No IAT                          | TJR outcomes****                                                    | RCT > LOS<br>prospective > LOS<br>retrospective (>10 cases) | 1     | IA therapies and TJR |
| How long do published studies of IAT wait after the injection to TJR? Does time affect TJR outcome?                                                          | TJR indications*<br>AND IAT** | Time to TJR after IAT**                      | -                               | TJR outcomes****                                                    | RCT > LOS<br>prospective > LOS<br>retrospective (>10 cases) | 2     |                      |
| Is it safe to inject GC, HA, saline, others in a joint with a prosthesis?                                                                                    | IAT**                         | Prosthesis (TJR***)                          | -                               | TJR outcomes****                                                    | LOS prospective > LOS retrospective (>10 cases)             | 3     |                      |
| Does administration of IA ther when there is cellulitis increase the rate of septic arthritis?                                                               | IAT**                         | Cellulitis                                   | -                               | Rate of septic arthritis                                            | RCT > LOS<br>prospective > LOS<br>retrospective (>10 cases) | 4     | Safety               |
| Is any injectable compound safe to use IA in septic arthritis?                                                                                               | IAT**                         | Septic arthritis                             | -                               | Safety outcomes*****                                                | LOS prospective > LOS retrospective (>10 cases)             | 5     |                      |
| Is it safe to inject a joint in a patient with fever? / Does the rate of infections increase in patients with fever?                                         | IAT**                         | Fever                                        | -                               | AE, rate of septic arthritis, etc                                   | LOS prospective > LOS retrospective (>10 cases)             | 6     |                      |
| Is it safe to use IA-GC in pts with DM? / Does the rate of diabetic complications increase with GC injections in diabetic patients?                          | IAT (GC)                      | DM                                           | -                               | Rate of acute events DM-related, changes in dosage of insulin, etc. | LOS prospective > LOS retrospective (>10 cases)             | 7     |                      |
| Does the rate of infections increase with IA GC in patients with diabetes?                                                                                   | IAT (GC)                      | DM                                           | -                               | Rate of infections                                                  | LOS prospective > LOS retrospective (>10 cases)             | 8     |                      |
| Does the rate of CV complications increase with IA injections in hypertensive patients, obese, or those with other CV risks?                                 | IAT**                         | hypertension, or obesity or CV risk          | -                               | Rate of CV complications                                            | LOS prospective > LOS retrospective (>10 cases)             | 9     |                      |
| Is a skin integrity breach associated to complications (infections, fistulae) in IA injections?                                                              | IAT**                         | Skin integrity breach (infections, fistulae) | -                               | Rate of infections                                                  | LOS prospective > LOS retrospective (>10 cases)             | 11    |                      |
| What's the rate of infection with IA injections? Is this rate different than that of venepuncture?                                                           | IAT** / Venepuncture          | -                                            | -                               | Rate of infections                                                  | LOS prospective > LOS retrospective (>10 cases)             | 16    |                      |
| What measures decrease the rate of infection? How much? Are gloves always necessary? Does an operating theatre decrease significantly the rate of infection? | IAT**                         | Gloves, operating theatre                    | No gloves, no operating theatre | Rate of infections                                                  | RCT > LOS<br>prospective > LOS<br>retrospective (>10 cases) | 17    |                      |

| Research question                                                                                                                                       | P (population) | I (intervention or factor)                | C (comparator)        | O (outcome)                                               | T (trials)                                            | order | TOPIC                          |
|---------------------------------------------------------------------------------------------------------------------------------------------------------|----------------|-------------------------------------------|-----------------------|-----------------------------------------------------------|-------------------------------------------------------|-------|--------------------------------|
| Does the rate of bleeding complications increase with IA injections if the patient has a haematological disease that impairs clotting?                  | IAT**          | Clotting-impairing-haematological disease | -                     | Rate of bleeding complications                            | LOS prospective > LOS retrospective (>10 cases)       | 10    | Bleeding problems              |
| Are people treated with classic or new anticoagulants (ACO) at higher bleeding risk during and after an IA injection? What's the magnitude of the risk? | IAT**          | ACO                                       | -                     | Rate of bleeding                                          | LOS prospective > LOS retrospective (>10 cases)       | 12    |                                |
| Are people with ACO (any) at higher risk of thrombotic events if withdrawn for an IA injection? What's the magnitude of the risk?                       | IAT**          | ACO withdrawal                            | ACO continuation      | Rate of bleeding, rate of thrombotic events, other AEs    | RCT > LOS prospective > LOS retrospective (>10 cases) | 13    |                                |
| What's the effect and safety of IA therapies in joints with a Kellgren-Lawrence score of IV?                                                            | IAT**          | K-L 4                                     | -                     | Efficacy: Pain reduction                                  | LOS prospective > LOS retrospective (>10 cases)       | 14    | IA therapies in damaged joints |
| Does repeating the number of IA articular injections of GC, HA, saline has any effect on long term outcome or safety (infections, structural damage)?   | IAT**          | # of injections                           | -                     | Efficacy: Pain reduction<br>Long-term safety: MRI changes | LOS prospective > LOS retrospective (>10 cases)       | 15    | Repetitive IA ther             |
| Does the addition of IA anaesthesia reduce the discomfort of the procedure? Does it prolong the effect on pain? How long?                               | IAT**          | IA anaesthetics                           | PBO                   | Efficacy: Pain reduction<br>Long-term safety: MRI changes | RCT > LOS prospective > LOS retrospective (>10 cases) | 18    | Anaesthesia                    |
| Are IA anaesthetics safe on the cartilage?                                                                                                              | IAT**          | IA anaesthetics                           | PBO                   | Changes on cartilage (MRI?, in vitro?)                    | RCT > LOS prospective > LOS retrospective (>10 cases) | 19    |                                |
| Is topical anaesthesia as efficacious in reducing discomfort as IA anaesthesia?                                                                         | IAT**          | Topical anaesthetics                      | IA anaesthetics       | Efficacy: Discomfort / vasovagal effect                   | RCT > LOS prospective > LOS retrospective (>10 cases) | 20    |                                |
| Is IA lidocaine antiseptic?                                                                                                                             | IAT**          | IA lidocaine                              | Other IA anaesthetics | Rate of infection, Changes in joint microbiology          | RCT > LOS prospective > LOS retrospective (>10 cases) | 21    |                                |
| Is efficacy modified whether the product is accurately placed in the joint when injecting GC, HA, or saline?                                            | IAT**          | imaging-guided                            | non-imaging-guided    | Efficacy: Pain reduction                                  | RCT > LOS prospective > LOS retrospective (>10 cases) | 22    | Correct placement              |
| Is safety modified whether the product is accurately placed in the joint when injecting GC, HA, or saline?                                              | IAT**          | imaging-guided                            | non-imaging-guided    | Safety: Serious AE                                        | RCT > LOS prospective > LOS                           | 23    |                                |

| Research question                                                                                                                                          | P (population)                         | I (intervention or factor)                       | C (comparator)              | O (outcome)                                        | T (trials)                                                  | order | TOPIC                          |
|------------------------------------------------------------------------------------------------------------------------------------------------------------|----------------------------------------|--------------------------------------------------|-----------------------------|----------------------------------------------------|-------------------------------------------------------------|-------|--------------------------------|
|                                                                                                                                                            |                                        |                                                  |                             |                                                    | retrospective (>10 cases)                                   |       |                                |
| Can ultrasound rule out septae and be used to check the distribution of the isotope in radiosynovectomy?                                                   | IAT** radioisotopes                    | US                                               | Fluoroscopy                 | % Appropriate placement of needle                  | RCT > LOS<br>prospective > LOS<br>retrospective (>10 cases) | 24    |                                |
| Is synovial fluid aspiration enough to ensure you're in the joint?                                                                                         | IAT**                                  | Aspiration                                       | -                           | % Appropriate placement of needle (assessed by US) | Cross-sectional                                             | 25    |                                |
| Does correct placement of IAT in the joint depend on the approach?                                                                                         | IAT**                                  | Approach                                         |                             | % Appropriate placement of needle (assessed by US) | Cross-sectional                                             | 26    |                                |
| Is correct placement of IAT in the joint related to expertise?                                                                                             | IAT**                                  | Expertise                                        | -                           | % Appropriate placement of needle (assessed by US) | Cross-sectional                                             | 27    |                                |
| What's the effect of synovial fluid aspiration, whether is complete or partial in chronic inflamed joints? Does it have an effect on balance, pain, falls? | Knee OA                                | Partial arthrocentesis                           | Complete arthrocentesis     | Proprioception, pain, falls                        | RCT > LOS<br>prospective > LOS<br>retrospective (>10 cases) | 28    | <b>Aspiration</b>              |
| Does rest affect the outcome in IA injections of radioisotopes?                                                                                            | IA radioisotopes                       | Rest (and length)                                | No rest                     | Efficacy: Pain reduction<br>Safety: MRI changes    | RCT > LOS<br>prospective > LOS<br>retrospective (>10 cases) | 29    | <b>Care after IA procedure</b> |
| Is in-patient rest needed after IA injections?                                                                                                             | IAT**                                  | In-patient rest                                  | Out-patient rest or no rest | Efficacy: Pain reduction                           | RCT > LOS<br>prospective > LOS<br>retrospective (>10 cases) | 30    |                                |
| Are support bondage necessary to prolong the effect of IAT?                                                                                                | IAT**                                  | Bandages, casts, external support, kinesiotaping | No support bondage          | Efficacy: Pain reduction                           | RCT > LOS<br>prospective > LOS<br>retrospective (>10 cases) | 31    |                                |
| Is support bondage needed in non-weight-bearing joints after an IAT?                                                                                       | IAT** in hands, wrist, elbow, shoulder | Bandages, casts, external support, kinesiotaping | No support bondage          | Efficacy: Pain reduction                           | RCT > LOS<br>prospective > LOS<br>retrospective (>10 cases) | 32    |                                |
